# Supplementary material for: Pt doping and strong metal–support interaction as a strategy for NiMo-based electrocatalysts to boost the hydrogen evolution reaction in alkaline solution
Source: Royal Society of Chemistry journal article supplement (doi:10.1039/d2ta03934f), 2022-01-01
Supplement: d2ta03934f1.pdf [file d2ta03934f1.pdf]

## Supporting Information

### Doping Pt and Strong Metal-Support Interaction as a Strategy for NiMo-based Electrocatalyst to Boost Hydrogen Evolution Reaction in Alkaline Solution

Jiao Liu,<sup>a</sup> Zuochao Wang,<sup>a</sup> Xueke Wu,<sup>a</sup> Dan Zhang,<sup>b</sup> Yan Zhang,<sup>a</sup> Juan Xiong,<sup>a</sup> Zexing Wu,<sup>a</sup> Jianping

Lai<sup>a,\*</sup> and Lei Wang<sup>a,b,\*</sup>

<sup>a</sup> Key Laboratory of Eco-Chemical Engineering, Key Laboratory of Optic-electric Sensing and Analytical Chemistry of Life Science, Taishan Scholar Advantage and Characteristic Discipline Team of Eco-Chemical Process and Technology, College of Chemistry and Molecular Engineering, Qingdao University of Science and Technology, Qingdao 266042, P. R. China.

<sup>b</sup> Shandong Engineering Research Center for Marine Environment Corrosion and Safety Protection, College of Environment and Safety Engineering, Qingdao University of Science and Technology, Qingdao 266042, P. R. China

Correspondence and requests for materials should be addressed to J.L. (e-mail: jplai@qust.edu.cn) and L.W. (e-mail: inorchemwl@126.com).

**Chemicals:** Molybdenumhexacarbonyl ( $\text{Mo}(\text{CO})_6$ , 98%) and deuterium oxide ( $\text{D}_2\text{O}$ ) was bought from Sigma-Aldrich. Acetylaceton platinum ( $\text{C}_{10}\text{H}_{14}\text{O}_4\text{Pt}$ , 97%), Acetylaceton palladium ( $\text{C}_{10}\text{H}_{14}\text{O}_4\text{Pd}$ , 34.9%) was purchased from Macklin. Nickel acetate tetrahydrate ( $\text{Ni}(\text{oAc})_2 \cdot 4\text{H}_2\text{O}$ , 99%) and Triruthenium dodecacarbonyl ( $\text{Ru}_3(\text{CO})_{12}$ , 98%) and Carboxylated multi-walled carbon nanotubes (CNT) was bought from Aladdin.

**Preparation of M-Ni<sub>4</sub>Mo/CNT:** First, 10 mg of processed CNT, 16 mg  $\text{Ni}(\text{oAc})_2 \cdot 4\text{H}_2\text{O}$  and 4 mg  $\text{Mo}(\text{CO})_6$  and 1.1 mg  $\text{C}_{10}\text{H}_{14}\text{O}_4\text{Pt}$  were mixed and ground in a mortar for 30 minutes to mix evenly. Then, the mixture

1 was put into a 10 mL quartz bottle and microwaved in a household microwave oven for 60 s. Ru-Ni<sub>4</sub>Mo/CNT  
2 and Pd-Ni<sub>4</sub>Mo/CNT was prepared according to the same experimental procedures except the precious metals  
3 used are different.

4 **Preparation of Pt-Ni<sub>4</sub>Mo/CNT in different Pt proportions:** First, 10 mg of processed CNT, 16 mg  
5 Ni(oAc)<sub>2</sub> · 4H<sub>2</sub>O and 4 mg Mo(CO)<sub>6</sub> and 0.6 mg C<sub>10</sub>H<sub>14</sub>O<sub>4</sub>Pt (3 wt% Pt-Ni<sub>4</sub>Mo/CNT)/1.5 mg C<sub>10</sub>H<sub>14</sub>O<sub>4</sub>Pt (7  
6 wt% Pt-Ni<sub>4</sub>Mo/CNT) were mixed and ground in a mortar for 30 minutes to mix evenly. Then, the mixture  
7 was put into a 10 mL quartz bottle and microwaved in a household microwave oven for 60 s.

8 **Characterization.** To study the morphology and structure of the catalyst, a scanning electron microscope  
9 (SEM) was tested on Hitachi S-4800 instrument. The transmission electron microscope (TEM) and high  
10 resolution. TEM (HRTEM) of the catalyst were tested using FEI Tecnai-G2 F30 at an accelerating voltage  
11 of 300 KV, and the structure of the catalyst was further characterized. Powder X-ray diffraction (XRD)  
12 spectrum recording was performed on an X'Pert-PRO MPD diffractometer, which was run with Cu K $\alpha$   
13 radiation at 40 KV and 40 mA. The content of elements is determined by inductively coupled plasma atomic  
14 emission spectrometer (ICP-AES, Varian 710-ES). X-ray photoelectron spectroscopy (XPS) analysis was  
15 performed with an Axis Supra spectrometer using a monochromatic Al K $\alpha$  source source at 15 mA and 14  
16 kV. Scan analysis with an analysis area of 300 × 700 microns and a pass energy of 100 eV. The spectrum  
17 was calibrated by carbon 1s spectrum, and its main line was set to 284.8 eV, and then the valence state of  
18 the catalyst was analyzed using Casa XPS software. In situ attenuated total reflection surface-enhanced  
19 infrared absorption spectroscopy (ATR-SEIRAS) was utilized to measure the changes of O-H bonding state

1 of absorbed water molecule. The catalyst that has been tested for stability is scraped from the working  
2 electrode by ultrasonic treatment and collected for the next step of SEM, TEM and XRD characterization.

3 **Electrochemical measurements.** Disperse 1 mg of the catalyst in 1 mL of a mixed solution of ethanol +  
4 5% Nafion (v: v=1: 0.01), after sonication for 1 h, the different catalysts with the concentration of 1 mg mL<sup>-1</sup>  
5 was obtained. Electrochemical measurements were carried out in a conventional three-electrode battery of a  
6 CHI 760E Electrochemical Workstation (Shanghai Chenhua Instrument Corporation, China). A graphite rod  
7 electrode was used as the counter electrode, and the reference electrode was a saturated calomel electrode  
8 (SCE). All the potentials were calibrated to reversible hydrogen electrode (RHE) according to the Nernst  
9 equation:  $E_{\text{RHE}} = E_{\text{SCE}} + 0.0592 \cdot \text{pH} + 0.2438$ . A glassy carbon electrode (GCE, diameter: 3 mm, area:  
10 0.07065 cm<sup>2</sup>) was used as the working electrode. Take 10  $\mu\text{L}$  of the mixed slurry and drop it evenly on the  
11 surface of the GCE. After it is naturally dried, further electrochemical tests are performed. All potentials  
12 reported in this work are corrected using reversible hydrogen electrodes (RHE). In a 1.0 M KOH solution  
13 saturated with N<sub>2</sub>, linear sweep voltammetry (LSV) was used to test and evaluate the HER performance of  
14 the catalyst at a sweep rate of 5 mV s<sup>-1</sup>. All polarization curves were corrected for 95% iR. The durability  
15 test was performed 200 hours at an initial potential of -0.87 V vs. RHE in 1.0 M KOH solution using  
16 chronoamperometry. In addition, the LSV after 10,000 cycles of CV was measured to further evaluate the  
17 stability of the catalyst. Electrochemical impedance spectroscopy (EIS) measurement was performed at a  
18 frequency of 0.1 Hz to 100 kHz in a 1.0 M KOH solution saturated with N<sub>2</sub>.

1 **Calculation of turnover frequency (TOF).** Owing to the bulk nature of the catalysts, we selected an  
2 electrochemical method to obtain the TOF values of each sample. Nearly all the surface active sites were  
3 assumed to be accessible by the electrolyte, and then the TOF values could be calculated by the following  
4 equation:

$$5 \quad TOF = \frac{I}{2Fn}$$

6 where I, n, and F are the current during linear sweep measurement, the number of active site number, and  
7 the Faraday constant, respectively. The factor 1/2 is because water electrolysis requires two electrons to  
8 evolve one hydrogen molecule from two protons. The active site number were determined from the CV  
9 curves measured in 1 M PBS electrolyte (pH = 7). Since it is very difficult to assign the observed peaks to a  
10 given redox couple, the surface active sites are nearly in linear relationship with the integrated voltammetric  
11 charges (cathodic and anodic) over the CV curves. Assuming a one-electron process for both reduction and  
12 oxidation, we can evaluate the upper limit of the active site number according to the follow formula:

$$13 \quad n = \frac{Q_{cv}}{2F}$$

14 where the Q represent the whole charge of CV curve.

15 **ECSA measurements.** To estimate ECSA values of the materials, double-layered capacitance ( $C_{dl}$ ) was  
16 measured using a simple cyclic voltammetry method. Here, the potential window has been chosen to be  
17 outside the material's possible faradic region (0.94~1.04 V vs RHE) and CV were recorded at various scan  
18 rates ranging from 20-100 mV s<sup>-1</sup>. The capacitive current density,  $\Delta J/2$ , was linearly related to scan rate and

1 the double layer capacitance ( $C_{dl}$ ) was calculated from the slopes of these straight lines.  $C_{dl}$  was further  
2 converted into ECSA using the specific capacitance value ( $\sim 0.04$  mF) of a standard  $1.0 \text{ cm}^{-2}$  surface.

3 **Calculation Setup.** We have employed the Vienna Ab Initio Package (VASP) to perform all the density  
4 functional theory (DFT) calculations within the generalized gradient approximation (GGA) using the PBE  
5 formulation. We have chosen the projected augmented wave (PAW) potentials to describe the ionic cores  
6 and take valence electrons into account using a plane wave basis set with a kinetic energy cutoff of 450 eV.  
7 Partial occupancies of the Kohn-Sham orbitals were allowed using the Gaussian smearing method and a  
8 width of 0.05 eV. The electronic energy was considered self-consistent when the energy change was smaller  
9 than  $10^{-5}$  eV. A geometry optimization was considered convergent when the force change was smaller than  
10  $0.03 \text{ eV}/\text{\AA}$ . Grimme's DFT-D3 methodology was used to describe the dispersion interactions. During  
11 structural optimizations, the  $2 \times 2 \times 1$  Monkhorst-Pack k-point grid for Brillouin zone was used for k-point  
12 sampling for structures. The free energy ( $\Delta G$ ) for elemental reaction step were calculated as:

$$13 \quad \Delta G = \Delta E + \Delta E_{ZPE} - T\Delta S$$

14 where  $\Delta E$  is the difference between the total energy,  $\Delta E_{ZPE}$  and  $\Delta S$  are the differences in the zero-point  
15 energy and the change of entropy, T is the temperature ( $T = 300 \text{ K}$  in this work), respectively.

16

17

18

19

20

1 **Figures**

2

3

4

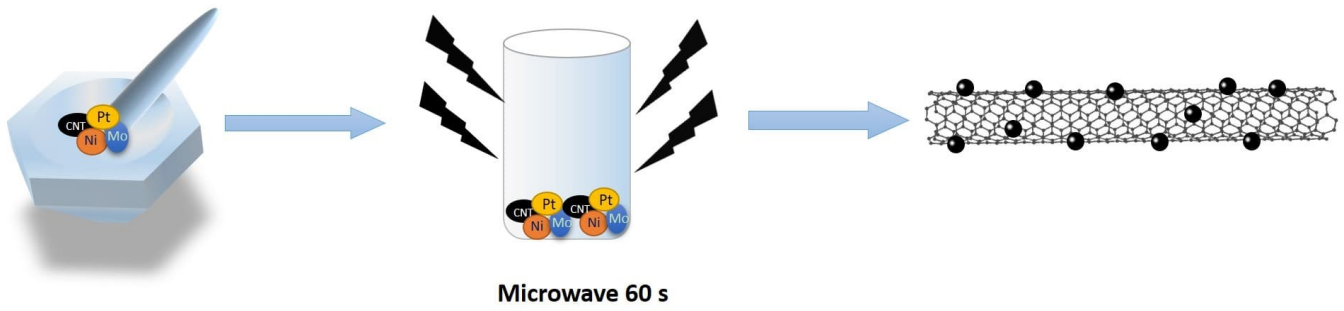

5

6

**Figure S1.** The synthesis diagram of the Pt-Ni<sub>4</sub>Mo/CNT nanomaterial.

7

8

9

10

11

12

13

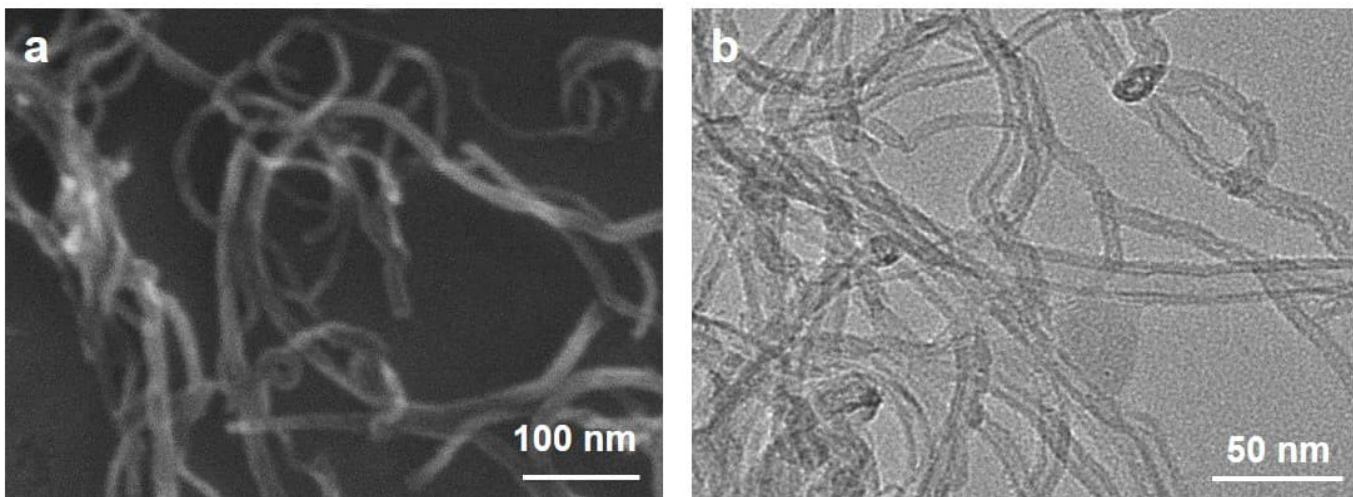

14

15

**Figure S2.** (a) SEM and (b) TEM images of CNT.

16

17

1

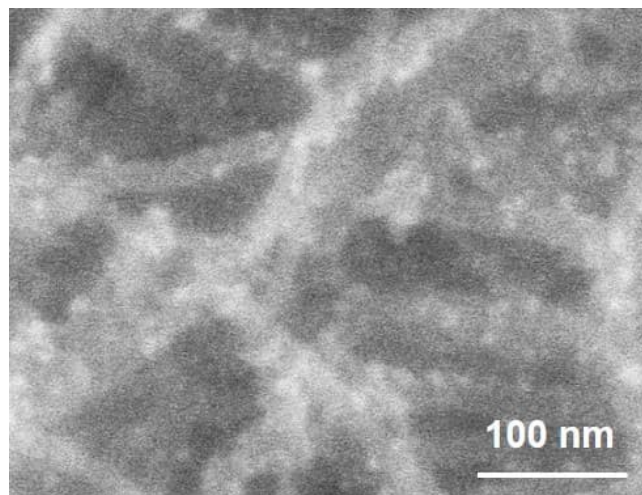

2

3

**Figure S3.** SEM image of Pt-Ni<sub>4</sub>Mo/CNT.

4

5

6

7

8

9

10

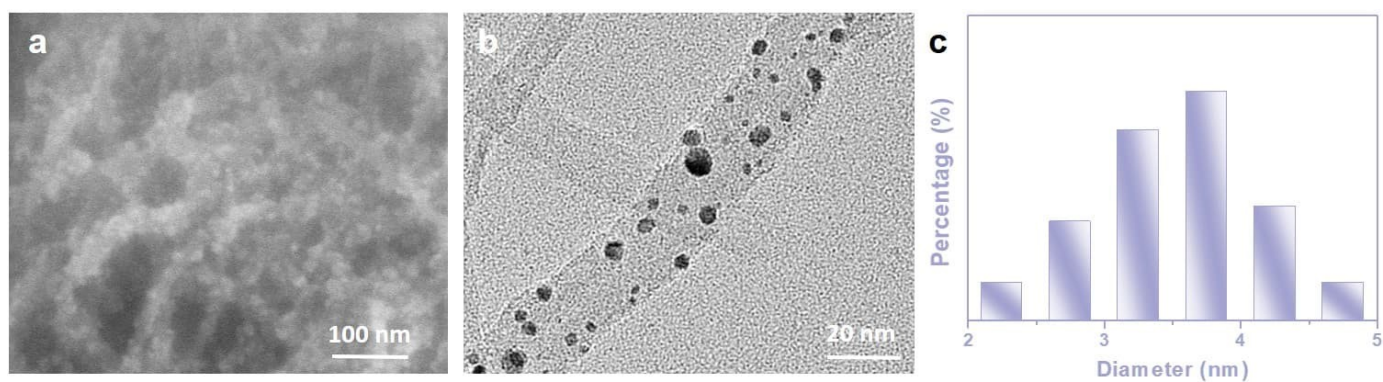

11

12

**Figure S4.** (a) SEM and (b)TEM images of Ni<sub>4</sub>Mo/CNT.

13

14

15

16

1  
2

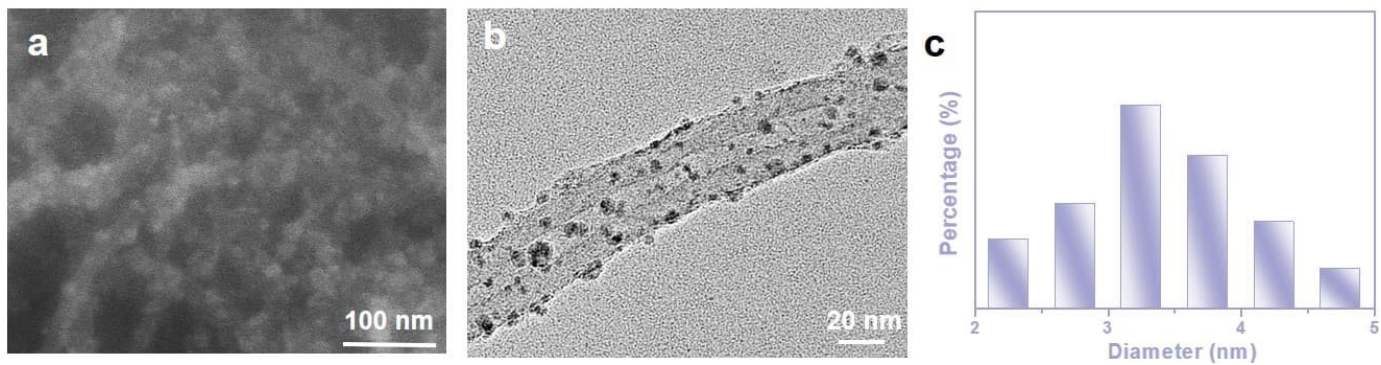

3  
4 **Figure S5.** (a) SEM and (b)TEM images of Ru-Ni<sub>4</sub>Mo/CNT.

5  
6  
7  
8  
9  
10  
11  
12  
13  
14  
15  
16  
17  
18

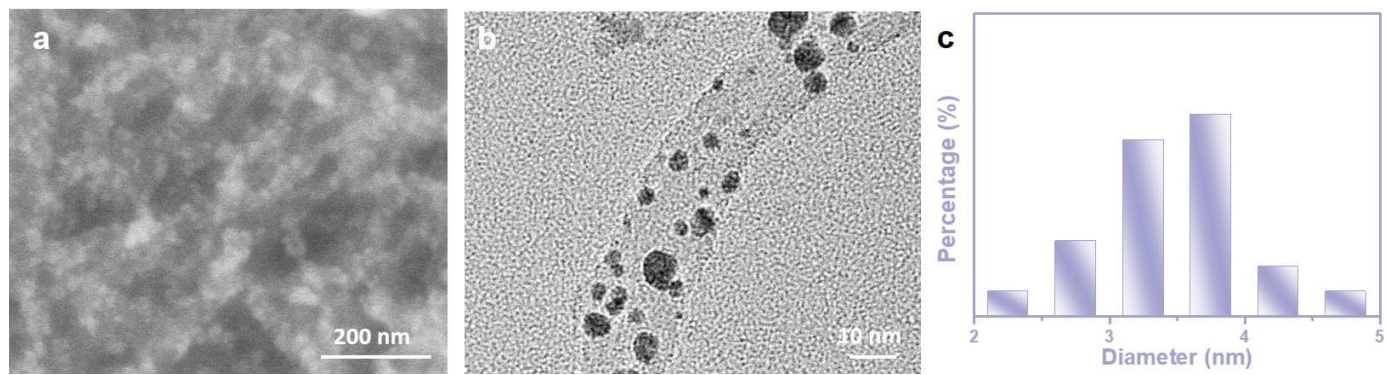

19  
20 **Figure S6.** (a) SEM and (b)TEM and images of Pd-Ni<sub>4</sub>Mo/CNT.

21  
22  
23  
24  
25  
26  
27



1  
2  
3

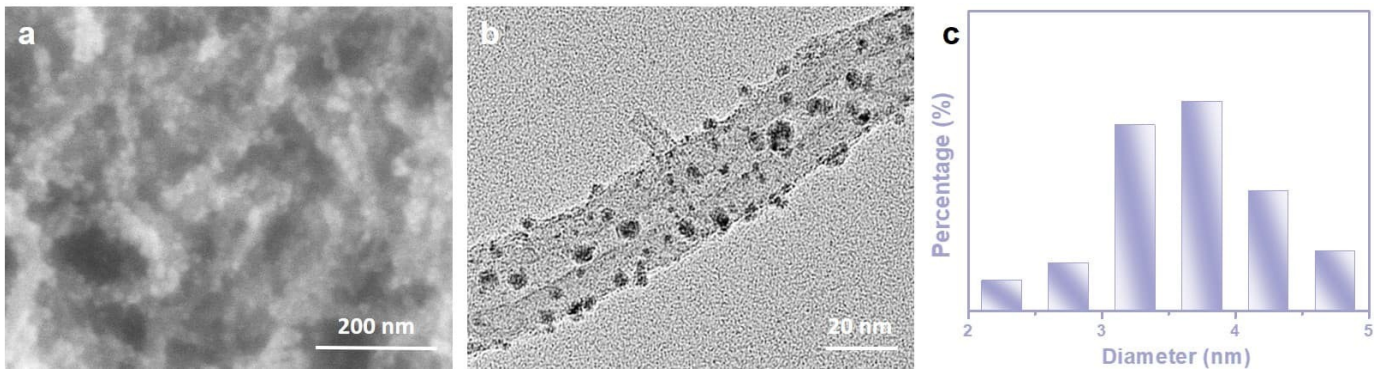

4  
5 **Figure S7.** (a) SEM and (b) TEM images of 3 wt% Pt-Ni<sub>4</sub>Mo/CNT.  
6

7  
8  
9  
10  
11  
12  
13  
14  
15  
16  
17  
18  
19  
20

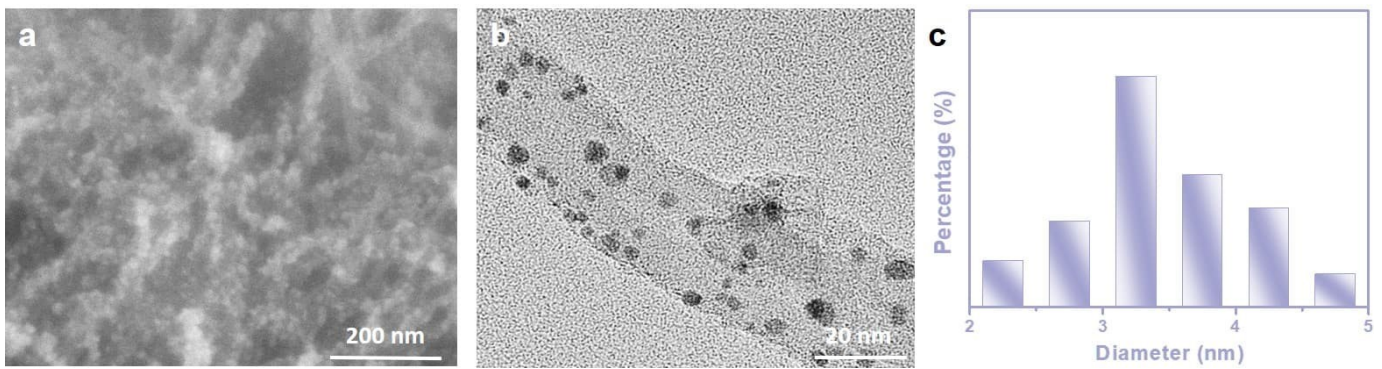

21 **Figure S8.** (a) SEM and (b) TEM images of 7 wt% Pt-Ni<sub>4</sub>Mo/CNT.  
22

23  
24  
25  
26  
27

1  
2  
3

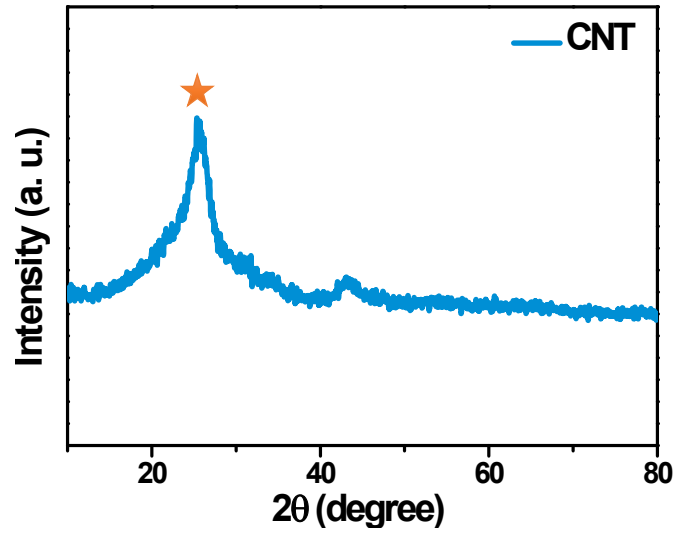

4  
5  
6  
7  
8  
9  
10

Figure S9. XRD pattern of CNT.

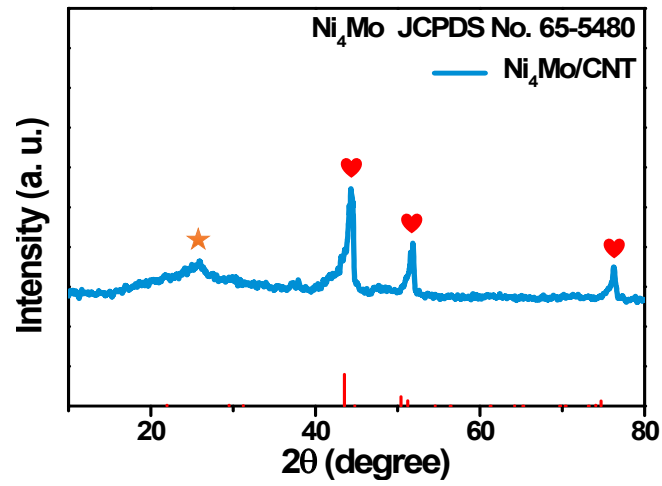

11  
12  
13  
14  
15

Figure S10. XRD pattern of  $\text{Ni}_4\text{Mo}/\text{CNT}$ .

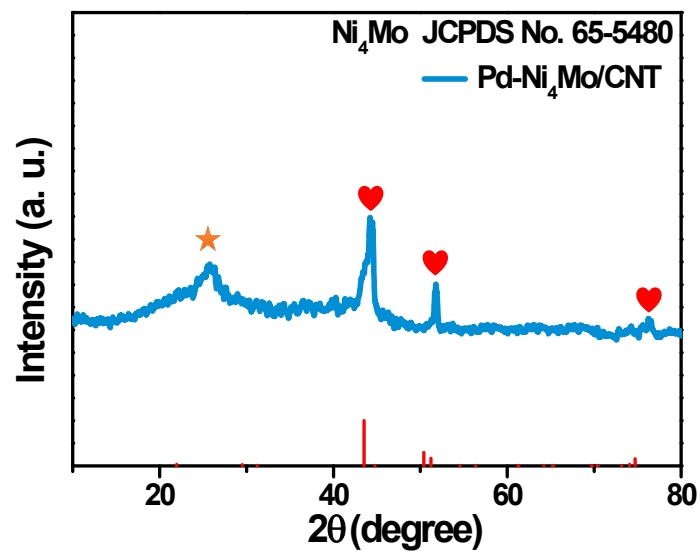

Figure S11. XRD pattern of Pd-Ni<sub>4</sub>Mo/CNT.

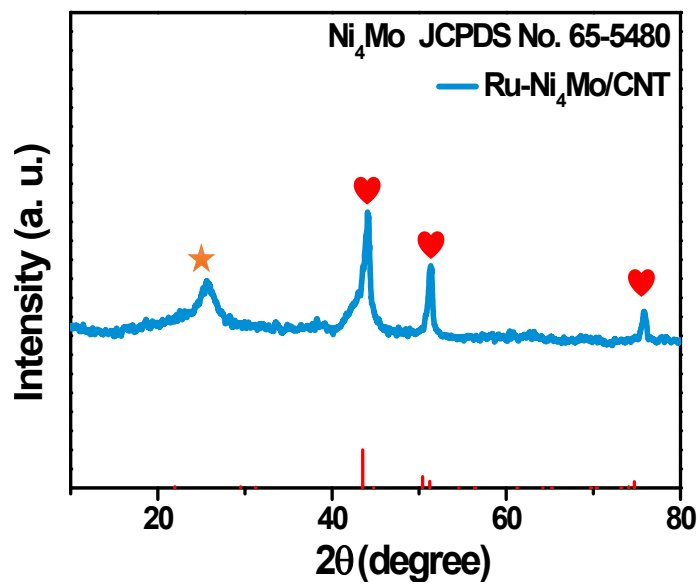

Figure S12. XRD pattern of Ru-Ni<sub>4</sub>Mo/CNT.

1

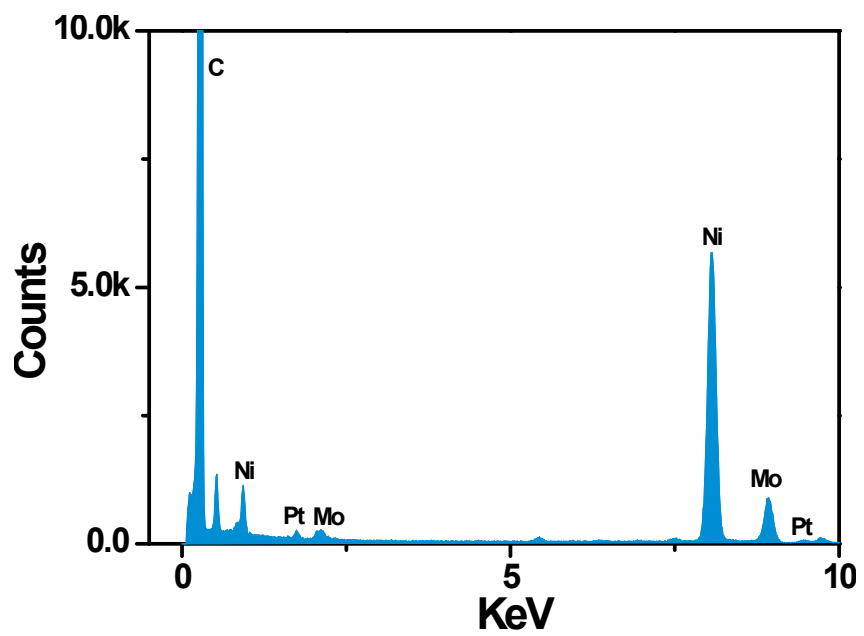

2

3

4

Figure S13. TEM-EDX image for Pt-Ni<sub>4</sub>Mo/CNT.

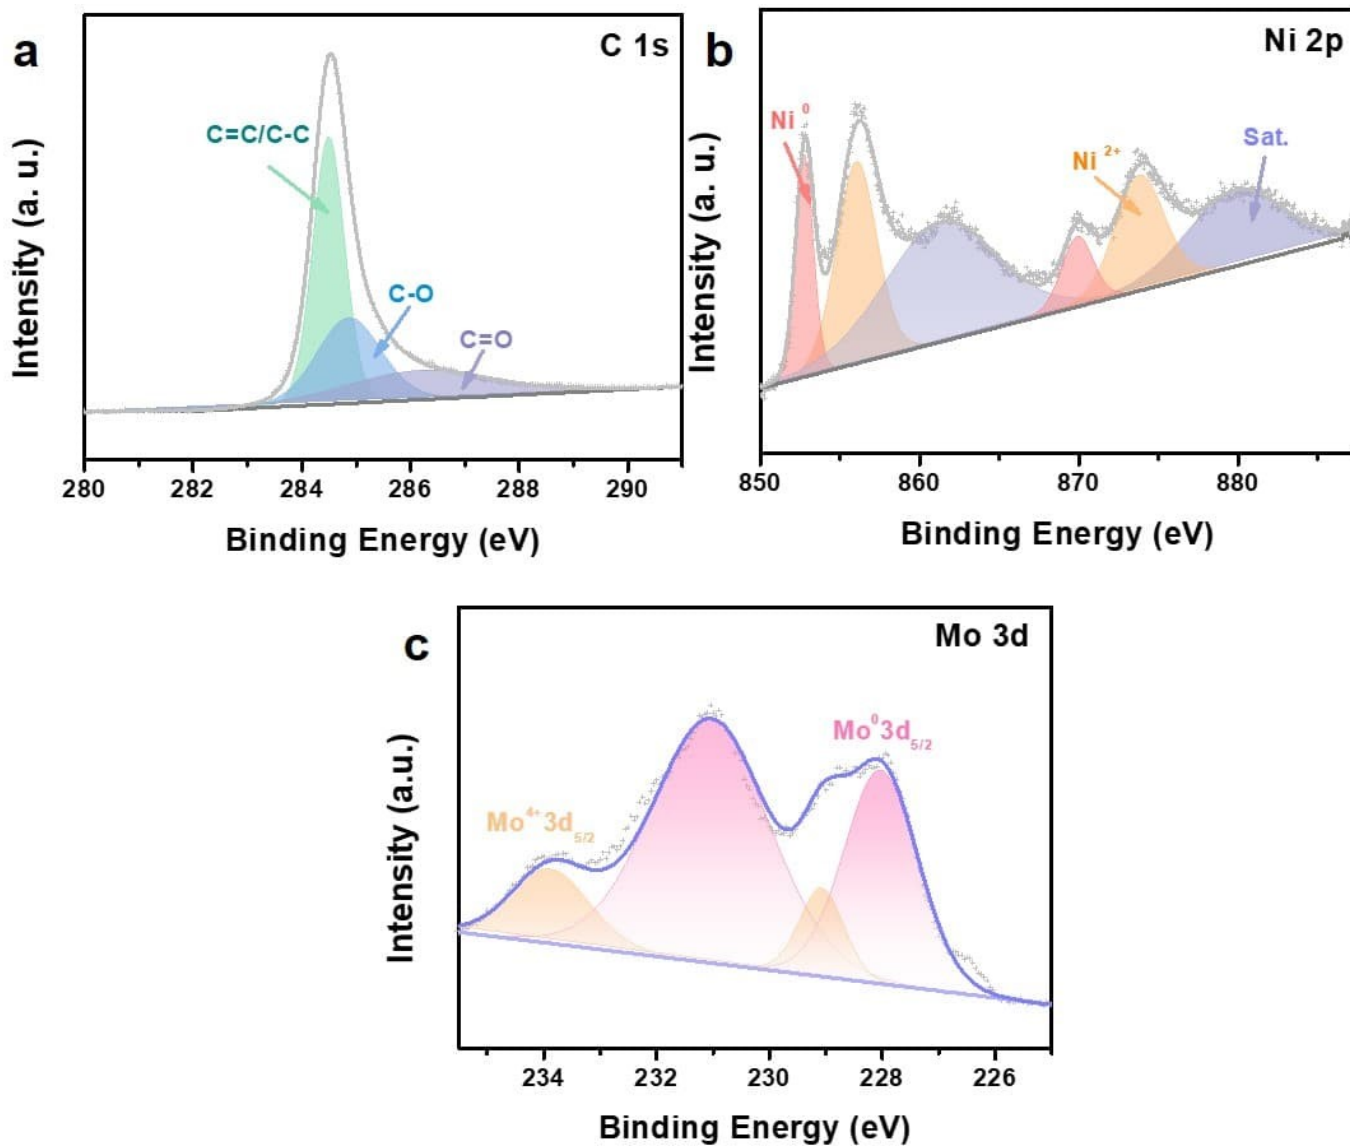

1

2

**Figure S14.** XPS spectra of Ni<sub>4</sub>Mo/CNT (a) C 1s, (b) Ni 2p and (c) Mo 3d.

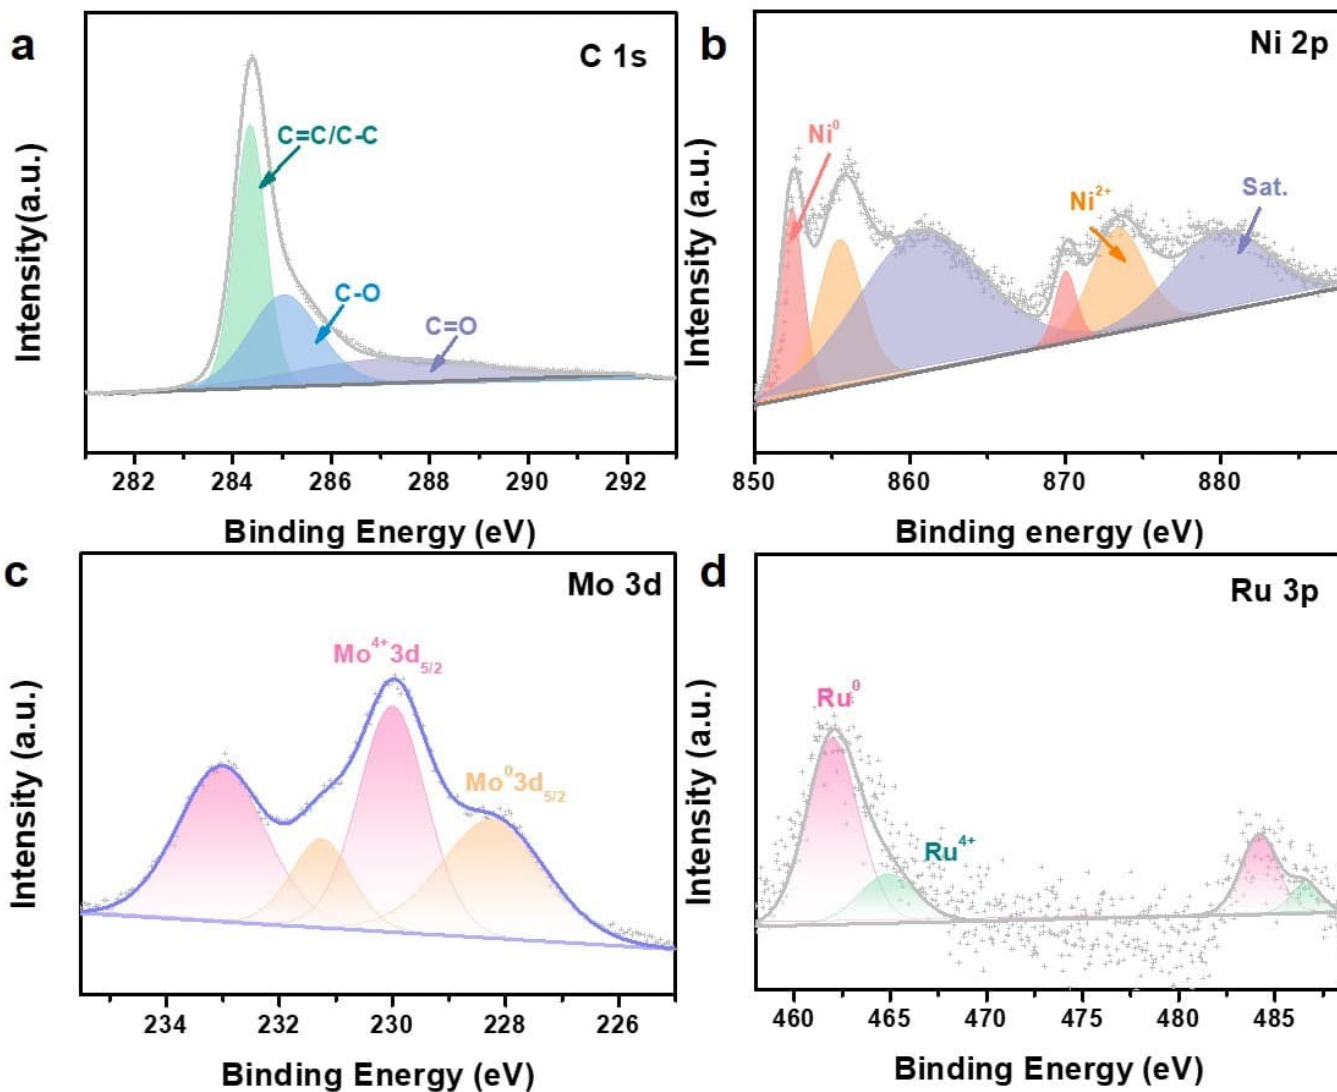

1

2

**Figure S15.** XPS spectra of Ru-Ni<sub>4</sub>Mo/CNT (a) C 1s, (b) Ni 2p, (c) Mo 3d and (4) Ru 3p.

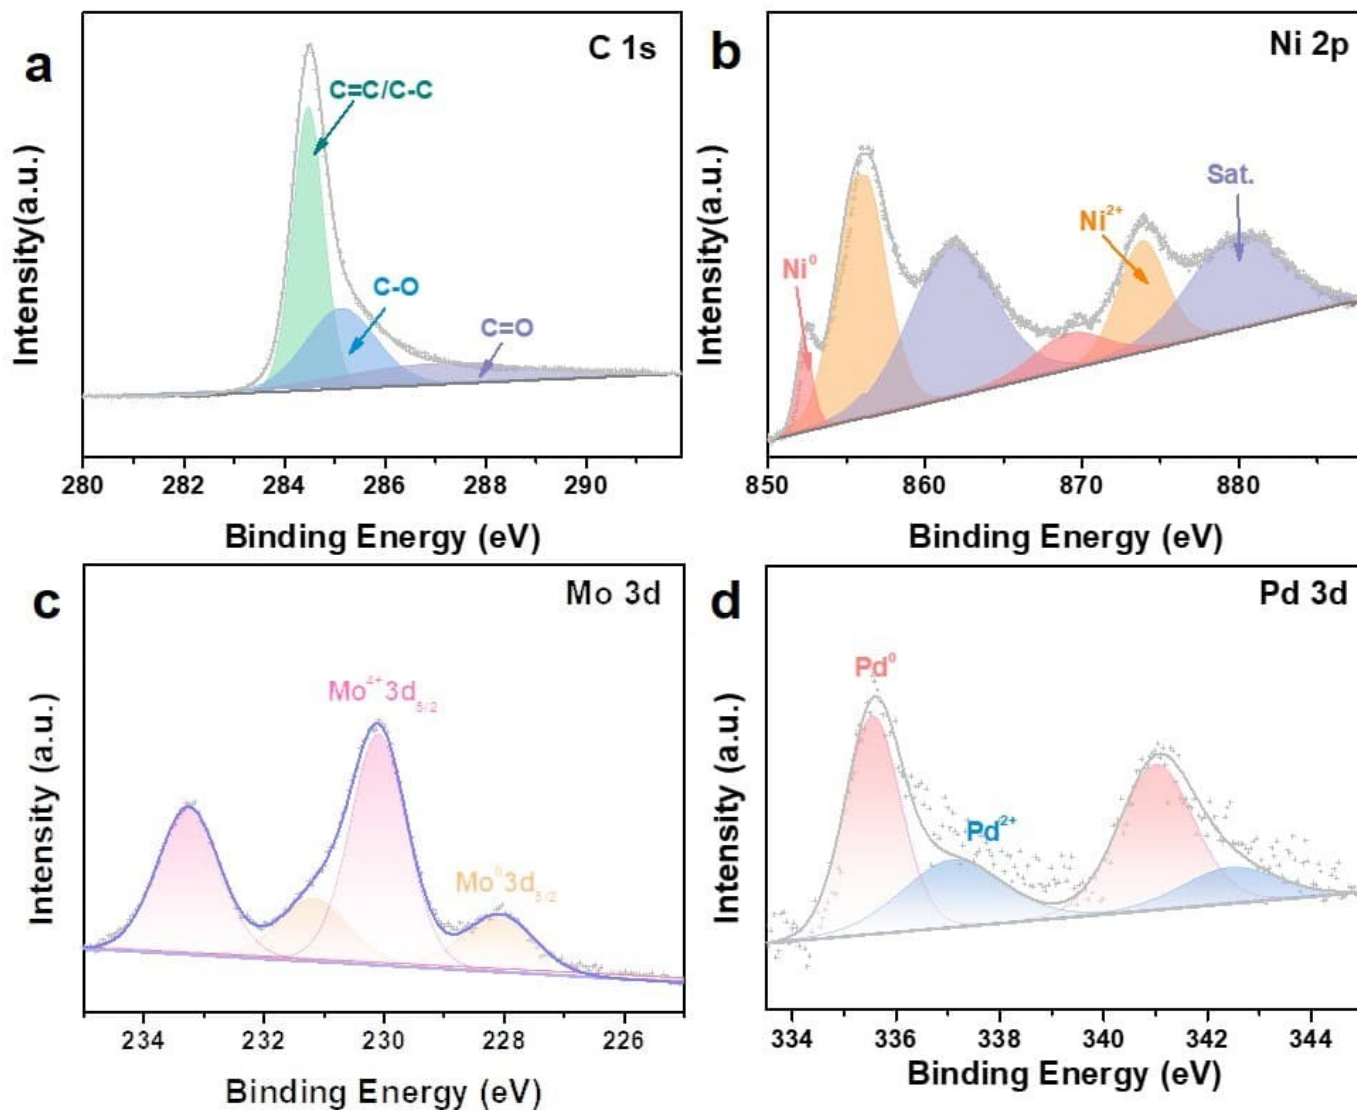

1  
2  
3

**Figure S16.** XPS spectra of Pd-Ni<sub>4</sub>Mo/CNT (a) C 1s, (b) Ni 2p, (c) Mo 3d and (4) Pd 3d.

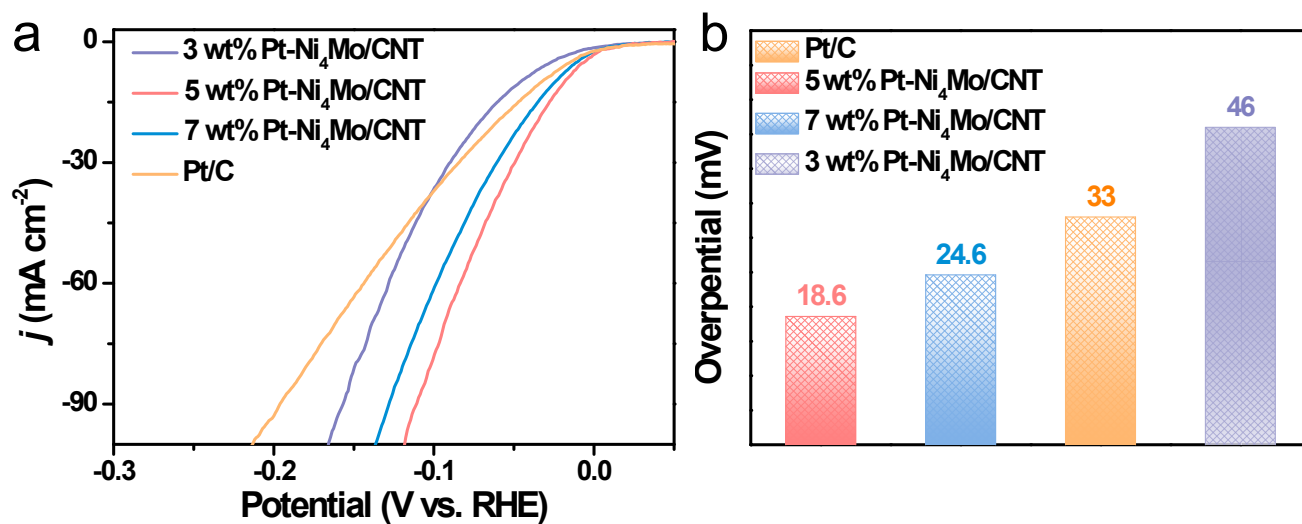

1  
2 **Figure S17.** (a) HER polarization curves and (b) the overpotential at 10 mA cm<sup>-2</sup> of Pt/C, 3 wt% Pt-  
3 Ni<sub>4</sub>Mo/CNT, 5 wt% Pt-Ni<sub>4</sub>Mo/CNT and 7 wt% Pt-Ni<sub>4</sub>Mo/CNT.

4  
5  
6  
7  
8

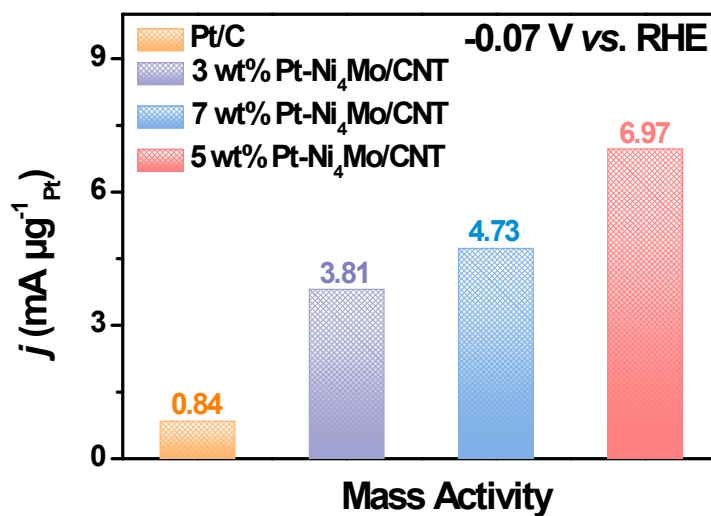

9  
10 **Figure S18.** Mass activity at -0.07 V vs. RHE of Pt/C, 3 wt% Pt-Ni<sub>4</sub>Mo/CNT, 5 wt% Pt-Ni<sub>4</sub>Mo/CNT and 7  
11 wt% Pt-Ni<sub>4</sub>Mo/CNT.



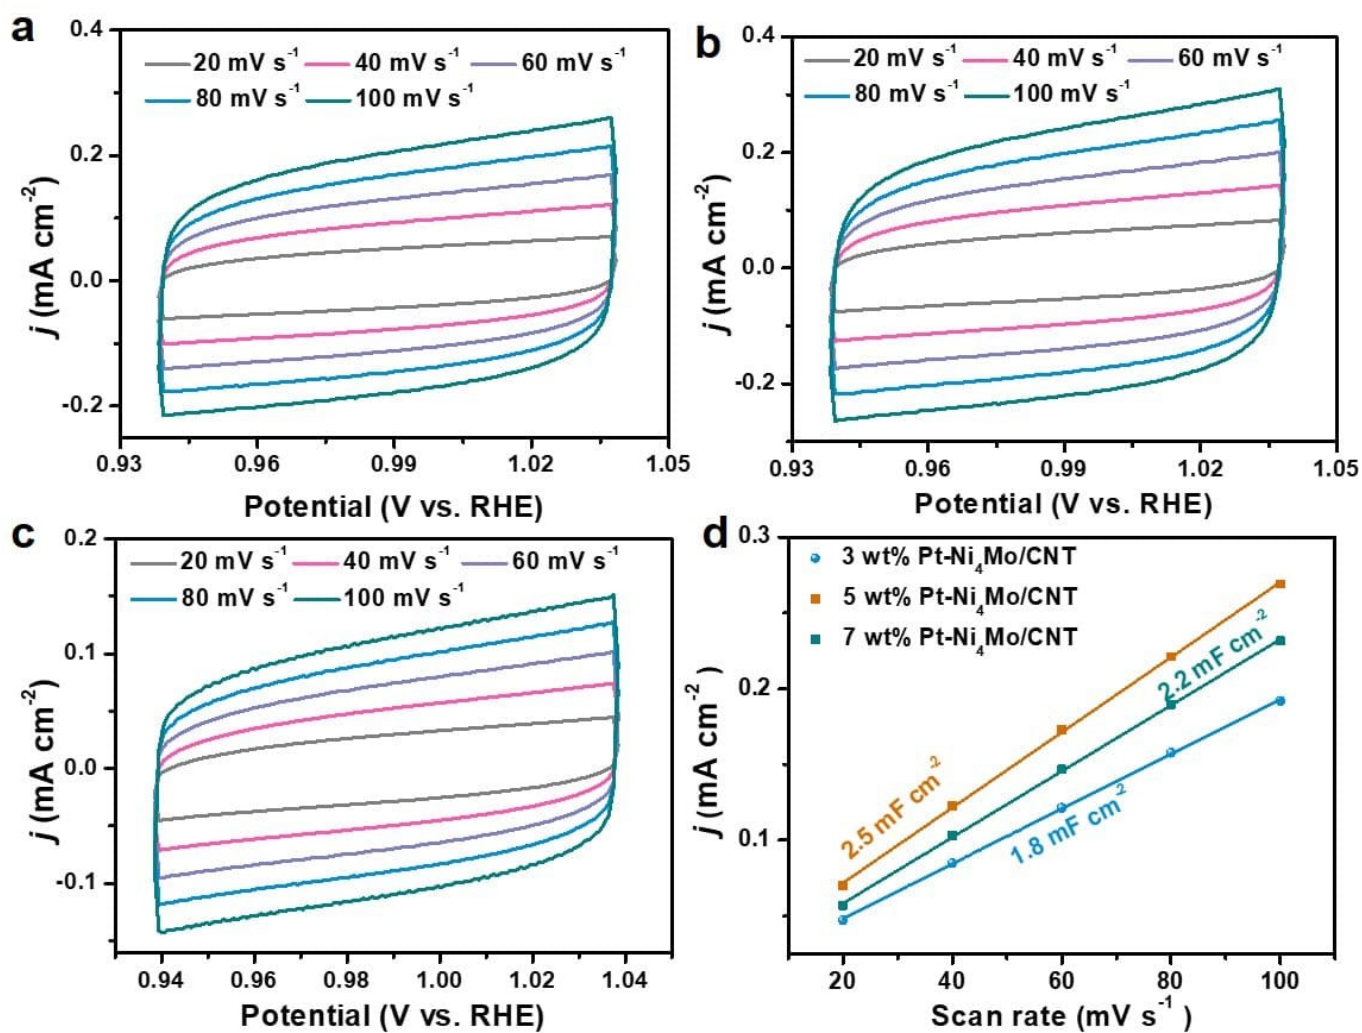

1

2 **Figure S19.** Cyclic voltammograms for (a) 3 wt% Pt-Ni<sub>4</sub>Mo/CNT, (b) 5 wt% Pt-Ni<sub>4</sub>Mo/CNT, (c) 7 wt% Pt-  
 3 Ni<sub>4</sub>Mo/CNT at scan rates of 20, 40, 60, 80 and 100 mV s<sup>-1</sup> and (d) Capacitive current at middle potential of  
 4 CV curves as function of scan rates for 3 wt% Pt-Ni<sub>4</sub>Mo/CNT, 5 wt% Pt-Ni<sub>4</sub>Mo/CNT, 7 wt% Pt-  
 5 Ni<sub>4</sub>Mo/CNT.

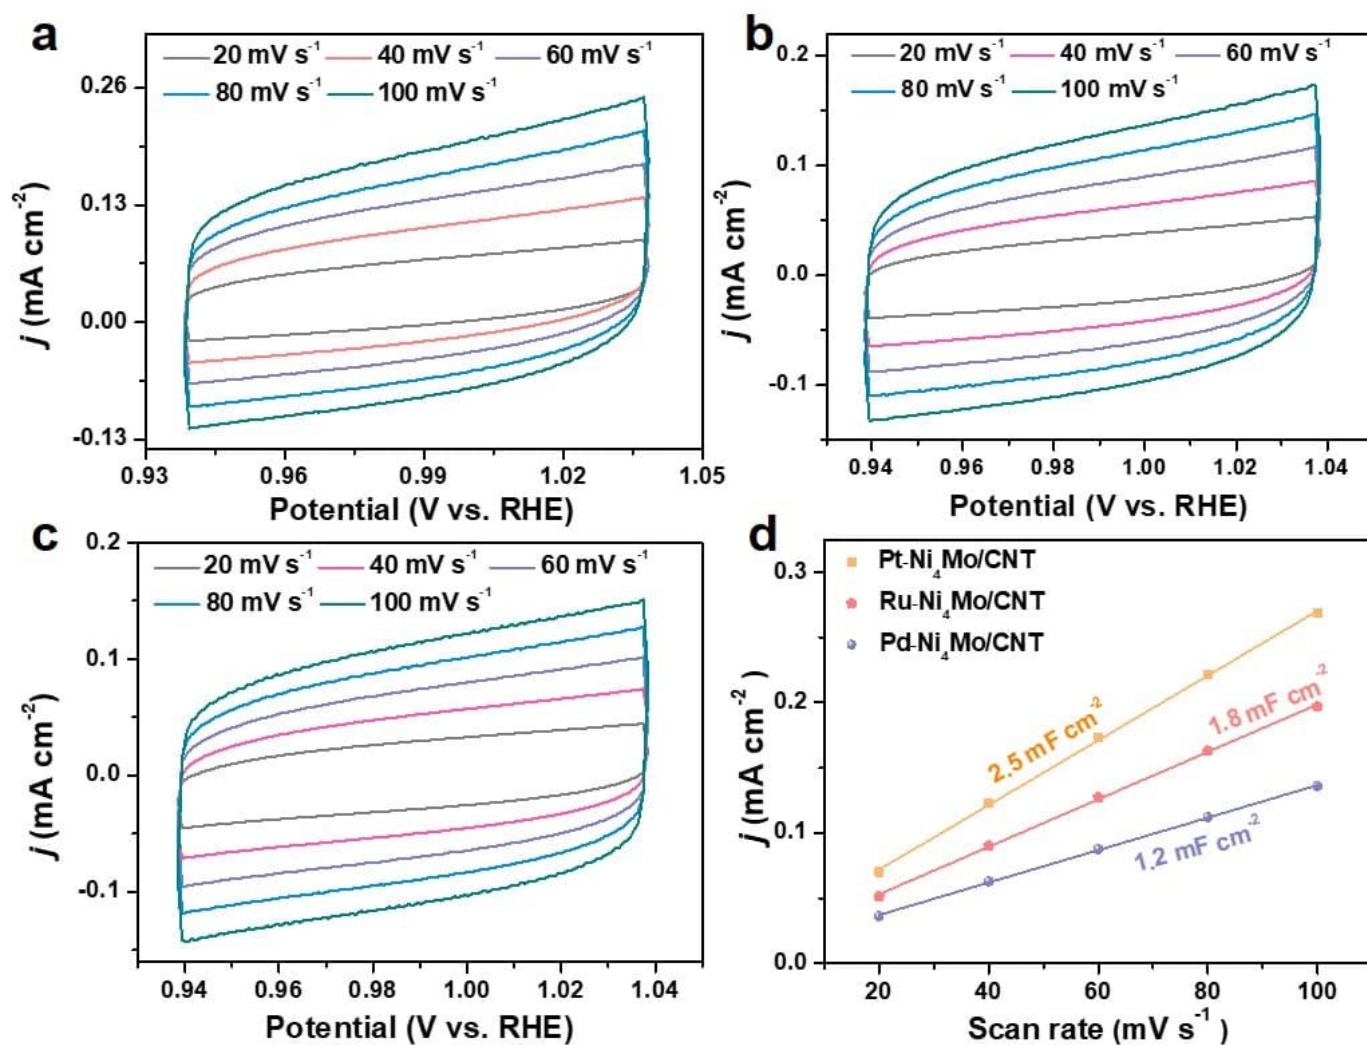

1

2 **Figure S20.** Cyclic voltammograms for (a) Pt-Ni<sub>4</sub>Mo/CNT, (b) Ru-Ni<sub>4</sub>Mo/CNT, (c) Pd-Ni<sub>4</sub>Mo/CNT at scan  
 3 rates of 20, 40, 60, 80 and 100 mV s<sup>-1</sup> and (d) Capacitive current at middle potential of CV curves as function  
 4 of scan rates for Pt-Ni<sub>4</sub>Mo/CNT, Ru-Ni<sub>4</sub>Mo/CNT, Pd-Ni<sub>4</sub>Mo/CNT.

5

6

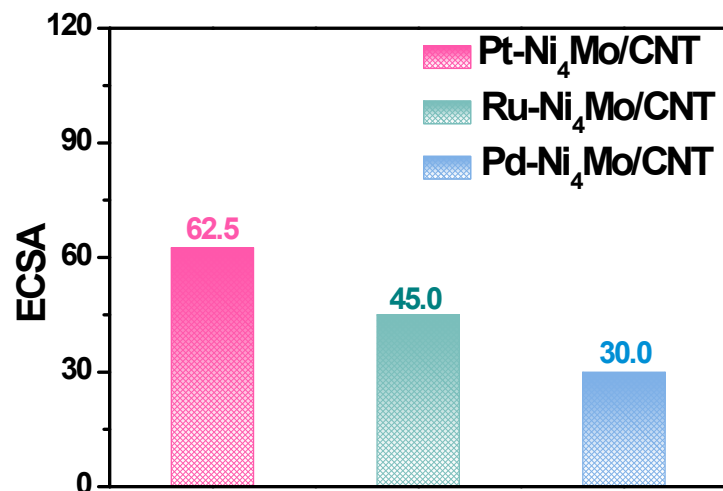

1  
2 **Figure S21.** Estimation of the ECSA of Pt-Ni<sub>4</sub>Mo/CNT, Ru-Ni<sub>4</sub>Mo/CNT, Pd-Ni<sub>4</sub>Mo/CNT.

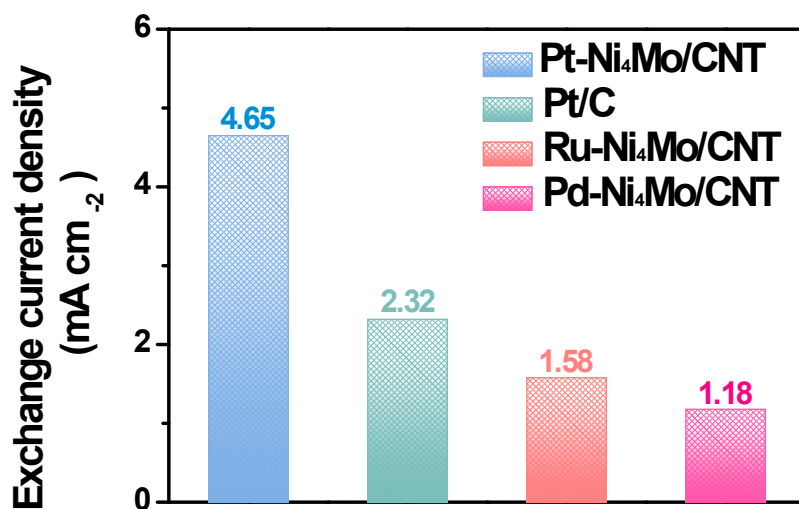

3  
4  
5  
6  
7  
8  
9  
10 **Figure S22.** Exchange current density of Pt-Ni<sub>4</sub>Mo/CNT, Ru-Ni<sub>4</sub>Mo/CNT, Pd-Ni<sub>4</sub>Mo/CNT and Pt/C.

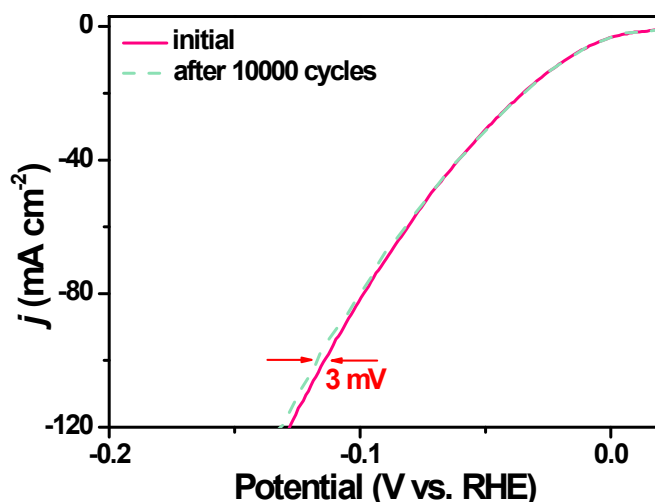

1  
2 **Figure S23.** Polarization curves for Pt-Ni<sub>4</sub>Mo/CNT catalyst before and after 10000 cycles.

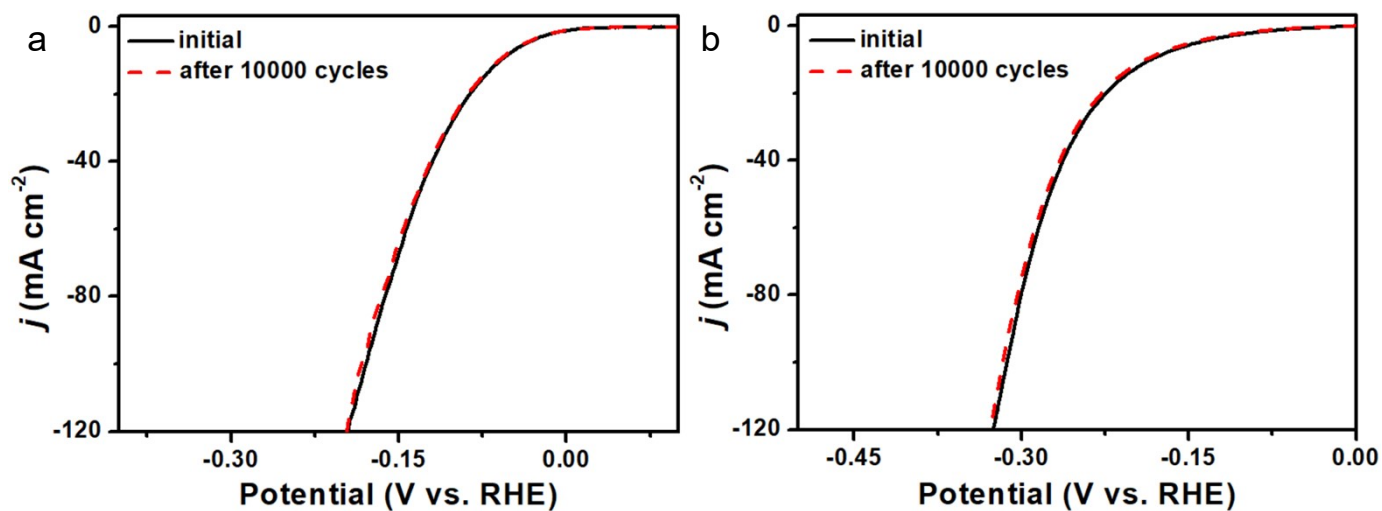

3  
4  
5  
6  
7  
8  
9  
10 **Figure S24.** Polarization curves for (a) Ru-Ni<sub>4</sub>Mo/CNT and (b) Pd-Ni<sub>4</sub>Mo/CNT catalysts before and after  
11 10000 cycles.

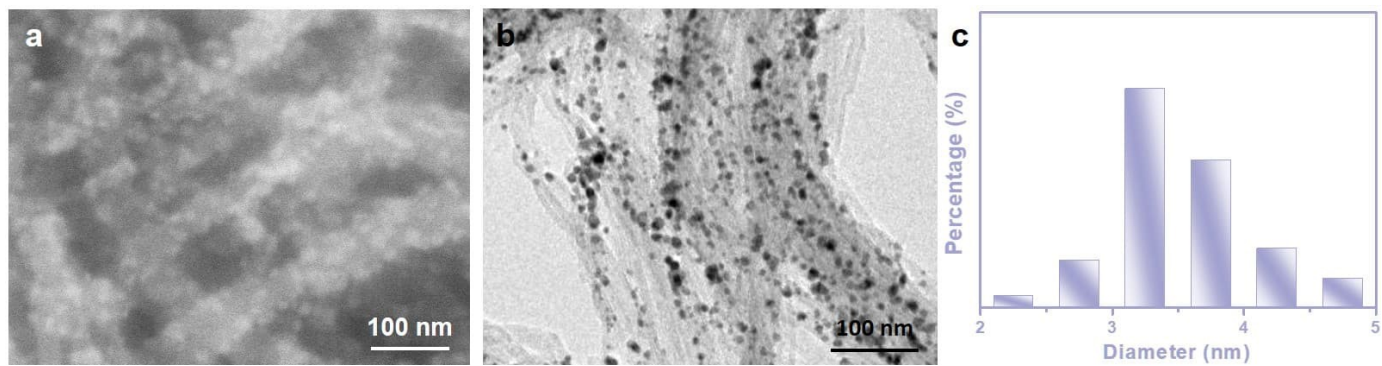

1  
2 **Figure S25.** (a) SEM and (b) TEM images of Pt-Ni<sub>4</sub>Mo/CNT after stability test.

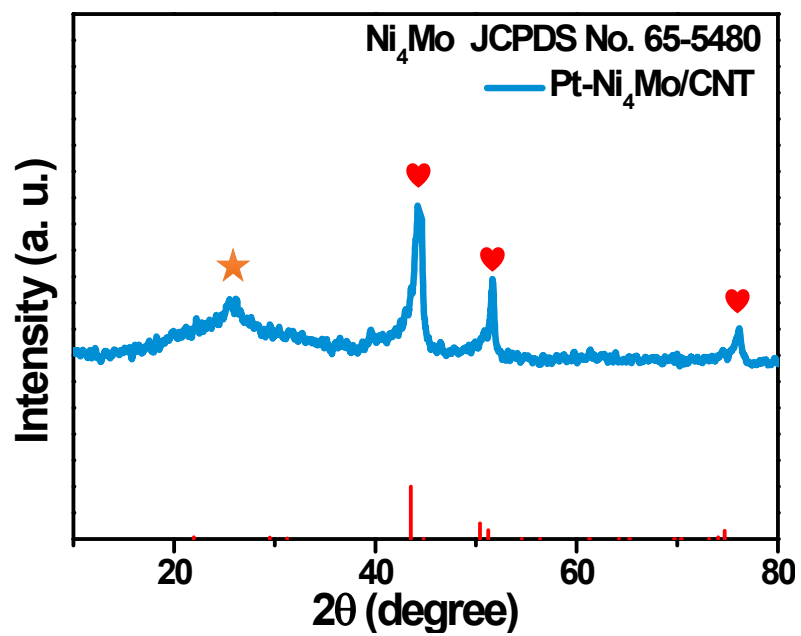

3  
4  
5  
6  
7  
8  
9  
10 **Figure S26.** XRD pattern of Pt-Ni<sub>4</sub>Mo/CNT after stability test.

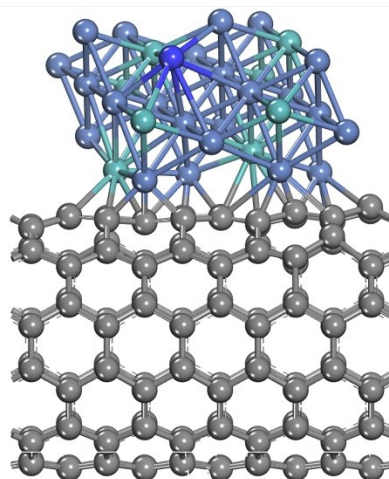

**Figure S27.** Optimized structures of Pt-Ni<sub>4</sub>Mo/CNT.

1  
2  
3  
4  
5  
6  
7  
8  
9  
10  
11  
12

**Table S1.** Atomic ratios of Pt-Ni<sub>4</sub>Mo/CNT characterized by ICP-AES.

|                                                         | Ni atom wt% | Mo atom wt% | Noble atom wt% |
|---------------------------------------------------------|-------------|-------------|----------------|
| 3 wt% Pt-Ni <sub>4</sub> Mo/CNT                         | 78.7        | 19.2        | 3.1            |
| 5 wt% Pt-Ni <sub>4</sub> Mo/CNT                         | 75.9        | 18.8        | 5.3            |
| 7 wt% Pt-Ni <sub>4</sub> Mo/CNT                         | 73.9        | 18.5        | 7.6            |
| Ru-Ni <sub>4</sub> Mo/CNT                               | 76.0        | 18.8        | 5.2            |
| Pd-Ni <sub>4</sub> Mo/CNT                               | 75.8        | 18.9        | 5.3            |
| 5 wt% Pt-Ni <sub>4</sub> Mo/CNT<br>after stability test | 75.6        | 19.0        | 5.4            |

13



1 **Table S2.** Summary of recently reported representative HER catalysts in 1.0 M KOH.

| Catalysts                                                                    | Loading amounts ( $\mu\text{g}/\text{cm}^2$ ) | $\eta_{10}$ (mV) | $J_{70}$ (A/mg)      | Reference                                                  |
|------------------------------------------------------------------------------|-----------------------------------------------|------------------|----------------------|------------------------------------------------------------|
| Pt-Ni <sub>4</sub> Mo/CNT                                                    | 3.47                                          | 18.6             | 6.97                 | This work                                                  |
| Pt NWs/SL-Ni(OH) <sub>2</sub>                                                | 16.1                                          | 70               | 0.15                 | <i>Nat. Commun.</i> 2015, <b>6</b> , 6430                  |
| Pt <sub>3</sub> Ni <sub>2</sub> -NWs-S/C                                     | 15.3                                          | 42               | 1.24                 | <i>Nat. Commun.</i> 2017, <b>8</b> , 14580                 |
| NiO <sub>x</sub> /Pt <sub>3</sub> Ni<br>Pt <sub>3</sub> Ni <sub>3</sub> -NWs | 15.3                                          | 40               | 2.59                 | <i>Angew. Chem. Int. Ed.</i> 2016, <b>55</b> , 12859-12863 |
| A-CoPt-NC                                                                    | 0.419                                         | 50               | 44.9                 | <i>Angew. Chem. Int. Ed.</i> 2019, <b>58</b> , 9647-9647   |
| PtNi-O/C                                                                     | 5.1                                           | 39.8             | 7.23                 | <i>J. Am. Chem. Soc.</i> 2018, <b>140</b> , 9046-9050      |
| BPed-Pt/GR                                                                   | 14.28                                         | 21               | 5.81                 | <i>Angew. Chem. Int. Ed.</i> 2019, <b>58</b> , 19060-19066 |
| Pt/NiO@Ni/NF                                                                 | 92                                            | 34               | 0.532<br>(at -50 mV) | <i>ACS Catal.</i> 2018, <b>8</b> , 8866-8872               |
| Pt <sub>SA</sub> -Ni <sub>3</sub> S <sub>2</sub>                             | /                                             | 33               | /                    | <i>Adv. Sci.</i> 2021, <b>8</b> , 2100347                  |
| Pt <sub>1</sub> /N-C                                                         | 250                                           | 46               | /                    | <i>Nat. Commun.</i> 2020, <b>11</b> , 1029                 |
| Pt-Ni ASs                                                                    | 17                                            | 27.7             | 2.8                  | <i>Adv. Mater.</i> 2018, <b>30</b> , 1801741               |
| Ni <sub>3</sub> N/Pt                                                         | /                                             | 50               | /                    | <i>Adv. Energy Mater.</i> 2017, <b>7</b> , 1601390         |
| N-LDH/2D-Pt                                                                  | 132                                           | 31               | 1.11                 | <i>ACS Nano.</i> 2020, <b>14</b> , 10578-10588             |

2

3



1 **Table S3.** TOF values of Pt-Ni<sub>4</sub>Mo/CNT and reported electrocatalysts in 1.0 M KOH.

| Catalyst                                                 | Potential (V) | TOF (s <sup>-1</sup> ) | Reference                                                  |
|----------------------------------------------------------|---------------|------------------------|------------------------------------------------------------|
| Pt-Ni <sub>4</sub> Mo/CNT                                | 0.1           | 6.49                   | This work                                                  |
| Co-NiS <sub>2</sub> NSs                                  | 0.1           | 0.55                   | <i>Angew. Chem. Int. Ed.</i> 2019, <b>58</b> , 18676-18682 |
| CoP/Ni <sub>5</sub> P <sub>4</sub> /CoP                  | 0.1           | 1.22                   | <i>Energy Environ. Sci.</i> 2018,11, 2246-2252             |
| MoNi <sub>4</sub> /MoO <sub>3-x</sub>                    | 0.1           | 1.13                   | <i>Adv. Mater.</i> 2017, <b>29</b> , 1703311               |
| P-Fe <sub>3</sub> O <sub>4</sub> /IF                     | 0.15          | 0.242                  | <i>Adv. Mater.</i> 2019, <b>31</b> , 1905107               |
| NiMoN@NiFeN                                              | 0.3           | 0.09                   | <i>Nat. Commun.</i> 2019, <b>10</b> , 5106                 |
| Ni-Mo                                                    | 0.1           | 0.43                   | <i>Small.</i> 2017, <b>13</b> , 1701648                    |
| NiMoN/NF-450                                             | 0.182         | 0.5                    | <i>J. Mater. Chem. A</i> 2018,6, 8479-8487                 |
| Ni <sub>4</sub> Mo/NF                                    | 0.087         | 0.8                    | <i>Adv. Mater. Interfaces</i> 2020, <b>7</b> , 1901949     |
| NiS/G-3                                                  | 0.3           | 2.475                  | <i>Appl. Catal. B Environ.</i> 2019, 254, 471-478          |
| Mo-doped Ni <sub>2</sub> P HNs                           | 0.27          | 0.125                  | <i>J. Mater. Chem. A</i> 2019,7, 7636-7643                 |
| Ni <sub>2</sub> P-Ni <sub>3</sub> S <sub>2</sub> HNAs/NF | 0.1           | 9.5                    | <i>Nano Energy</i> 2018, <b>51</b> , 26-36                 |
| Ni <sub>2</sub> P/Ni/NF                                  | 0.35          | 0.015                  | <i>ACS Catal.</i> 2016, <b>6</b> , 714-721                 |

2  
3

1 **Table S4.** Comparison of the stability of Pt-Ni<sub>4</sub>Mo/CNT and reported electrocatalysts in 1.0 M KOH.

| Catalyst                                                         | $\eta_{10}$ (mV) | Stability                          | Reference                                   |
|------------------------------------------------------------------|------------------|------------------------------------|---------------------------------------------|
| Pt-Ni <sub>4</sub> Mo/CNT                                        | 18.6             | 200 h @ 100 mA cm <sup>-2</sup>    | This work                                   |
| Pt <sub>4</sub> /Co                                              | 6.3              | 24 h @ 50 mA cm <sup>-2</sup>      | Angew. Chem. Int. Ed. 2021, 60, 25766-25770 |
| WO <sub>x</sub> -PtNi@Pt DNWs                                    | 24               | 6 h @ 10 mA cm <sup>-2</sup>       | Adv. Energy Mater. 2020, 11, 2003192        |
| Ni <sub>2</sub> P–NiP <sub>2</sub> HNPs/NF                       | 59.7             | 24 h @ 20 mA cm <sup>-2</sup>      | Adv. Mater. 2018, 30, 1803590               |
| N-LDH/2D-Pt                                                      | 31               | 50 h @ 10 mA cm <sup>-2</sup>      | ACS Nano, 2020, 14, 10578-10588             |
| Pt <sub>3</sub> Ni <sub>2</sub> NWs-S                            | 42               | 5 h @ 10 mA cm <sup>-2</sup>       | Nat. Commun. 2017, 8, 14580                 |
| 38 wt% Pt NWs/SL-Ni(OH) <sub>2</sub>                             | 70               | 95.7% activity retention after~1 h | Nat. Commun. 2015, 6, 6430.                 |
| PtNi-O                                                           | 39.8             | 10 h @ 10 mA cm <sup>-2</sup>      | J. Am. Chem. Soc. 2018, 140, 9046-9050      |
| 2H/1T-MoS <sub>2</sub>                                           | 200              | 200 h @ 150 mV                     | Nat. Commun. 2019, 10, 1348                 |
| Ni <sub>5</sub> P <sub>4</sub> @NiCo <sub>2</sub> O <sub>4</sub> | 27               | 45 h @ 20 mA cm <sup>-2</sup>      | Adv. Energy Mater. 2018, 8, 1801690         |
| Pt <sub>SA</sub> -Ni <sub>3</sub> S <sub>2</sub> @Ag NWs         | 33               | 30 h @ 100 mA cm <sup>-2</sup>     | Adv. Sci. 2021, 8, 2100347                  |
| Ni@N-CNT/NRs                                                     | 134              | 110 h @ 200 mV                     | Nano Res. 2020, 13, 975-982                 |
| Ni/V <sub>2</sub> O <sub>3</sub>                                 | 22               | 20 h @ 100 mA cm <sup>-2</sup>     | Nano Res. 2020, 13, 2407-2412               |

2
